# Supplementary material for: Probing Carbon Utilization of Cordyceps militaris by Sugar Transportome and Protein Structural Analysis
Source: Cells. 2020 Feb 10;9(2):401. doi: 10.3390/cells9020401 (PMC7072658; doi:10.3390/cells9020401)
Supplement: Supplementary file 1 [file cells-09-00401-s001.zip › cells-673666-supple-final2.xlsx]

## Sheet: Table S1
Table S1: Consensus features of sugar transportome.
Candadate Sugar Transporter	Consensus features
	Protein domain (PFAM)	Eukaryotic orthologous groups (KOG)	Protein families (InterPro)	Transporter classifications (TCDB)
CCM_07490	PF00083: Sugar transporter	KOG0254: Predicted transporter	IPR003663: Sugar/inositol transporter	2.A.1: Major facilitator superfamily
CCM_00728	PF00083: Sugar transporter	KOG0254: Predicted transporter	IPR003663: Sugar/inositol transporter	2.A.1: Major facilitator superfamily
CCM_07255	PF00083: Sugar transporter	KOG0254: Predicted transporter	IPR003663: Sugar/inositol transporter	2.A.1: Major facilitator superfamily
CCM_07588	PF00083: Sugar transporter	KOG0254: Predicted transporter	IPR003663: Sugar/inositol transporter	2.A.1: Major facilitator superfamily
CCM_08696	PF00083: Sugar transporter	KOG0254: Predicted transporter	IPR003663: Sugar/inositol transporter	2.A.1: Major facilitator superfamily
CCM_02729	PF00083: Sugar transporter	KOG0254: Predicted transporter	IPR003663: Sugar/inositol transporter	2.A.1: Major facilitator superfamily
CCM_05298	PF00083: Sugar transporter	KOG0254: Predicted transporter	IPR003663: Sugar/inositol transporter	2.A.1: Major facilitator superfamily
CCM_03583	PF00083: Sugar transporter	KOG0254: Predicted transporter	IPR003663: Sugar/inositol transporter	2.A.1: Major facilitator superfamily
CCM_02098	PF00083: Sugar transporter	KOG0254: Predicted transporter	IPR003663: Sugar/inositol transporter	2.A.1: Major facilitator superfamily
CCM_03623	PF00083: Sugar transporter	KOG0254: Predicted transporter	IPR003663: Sugar/inositol transporter	2.A.1: Major facilitator superfamily
CCM_06358	PF00083: Sugar transporter	KOG0254: Predicted transporter	IPR003663: Sugar/inositol transporter	2.A.1: Major facilitator superfamily
CCM_09215	PF00083: Sugar transporter	KOG0254: Predicted transporter	IPR003663: Sugar/inositol transporter	2.A.1: Major facilitator superfamily
CCM_00222	PF00083: Sugar transporter	KOG0254: Predicted transporter	IPR003663: Sugar/inositol transporter	2.A.1: Major facilitator superfamily
CCM_02140	PF00083: Sugar transporter	KOG0254: Predicted transporter	IPR003663: Sugar/inositol transporter	2.A.1: Major facilitator superfamily
CCM_04896	PF00083: Sugar transporter	KOG0254: Predicted transporter	IPR003663: Sugar/inositol transporter	2.A.1: Major facilitator superfamily
CCM_03115	PF00083: Sugar transporter	KOG0254: Predicted transporter	IPR003663: Sugar/inositol transporter	2.A.1: Major facilitator superfamily
CCM_09026	PF00083: Sugar transporter	KOG0254: Predicted transporter	IPR003663: Sugar/inositol transporter	2.A.1: Major facilitator superfamily
CCM_01080	PF00083: Sugar transporter	KOG0254: Predicted transporter	IPR003663: Sugar/inositol transporter	2.A.1: Major facilitator superfamily
CCM_07674	PF00083: Sugar transporter	KOG0254: Predicted transporter	IPR003663: Sugar/inositol transporter	2.A.1: Major facilitator superfamily
CCM_04946	PF00083: Sugar transporter	KOG0254: Predicted transporter	IPR003663: Sugar/inositol transporter	2.A.1: Major facilitator superfamily
CCM_01166	PF00083: Sugar transporter	KOG0254: Predicted transporter	IPR003663: Sugar/inositol transporter	2.A.1: Major facilitator superfamily
CCM_05726	PF00083: Sugar transporter	KOG0254: Predicted transporter	IPR003663: Sugar/inositol transporter	2.A.1: Major facilitator superfamily
CCM_06741	PF00083: Sugar transporter	KOG0254: Predicted transporter	IPR003663: Sugar/inositol transporter	2.A.1: Major facilitator superfamily
CCM_08090	PF00083: Sugar transporter	KOG0254: Predicted transporter	IPR003663: Sugar/inositol transporter	2.A.1: Major facilitator superfamily
CCM_00501	PF00083: Sugar transporter	KOG0254: Predicted transporter	IPR003663: Sugar/inositol transporter	2.A.1: Major facilitator superfamily
CCM_04797	PF00083: Sugar transporter	KOG0254: Predicted transporter	IPR003663: Sugar/inositol transporter	2.A.1: Major facilitator superfamily
CCM_06864	PF00083: Sugar transporter	KOG0254: Predicted transporter	IPR003663: Sugar/inositol transporter	2.A.1: Major facilitator superfamily
CCM_08999	PF00083: Sugar transporter	KOG0254: Predicted transporter	IPR003663: Sugar/inositol transporter	2.A.1: Major facilitator superfamily
CCM_00186	PF00083: Sugar transporter	KOG0254: Predicted transporter	IPR003663: Sugar/inositol transporter	2.A.1: Major facilitator superfamily
CCM_03527	PF00083: Sugar transporter	KOG0254: Predicted transporter	IPR003663: Sugar/inositol transporter	2.A.1: Major facilitator superfamily
CCM_04942	PF00083: Sugar transporter	KOG0254: Predicted transporter	IPR003663: Sugar/inositol transporter	2.A.1: Major facilitator superfamily
CCM_06002	PF00083: Sugar transporter	KOG0254: Predicted transporter	IPR003663: Sugar/inositol transporter	2.A.1: Major facilitator superfamily
CCM_07760	PF00083: Sugar transporter	KOG0254: Predicted transporter	IPR003663: Sugar/inositol transporter	2.A.1: Major facilitator superfamily
CCM_08598	PF00083: Sugar transporter	KOG0254: Predicted transporter	IPR003663: Sugar/inositol transporter	2.A.1: Major facilitator superfamily
CCM_05984	PF00083: Sugar transporter	KOG0254: Predicted transporter	IPR003663: Sugar/inositol transporter	2.A.1: Major facilitator superfamily
CCM_08290	PF00083: Sugar transporter	KOG0254: Predicted transporter	IPR003663: Sugar/inositol transporter	2.A.1: Major facilitator superfamily
CCM_01532	PF00083: Sugar transporter	KOG0254: Predicted transporter	IPR003663: Sugar/inositol transporter	2.A.1: Major facilitator superfamily
CCM_03819	PF00083: Sugar transporter	KOG0254: Predicted transporter	IPR003663: Sugar/inositol transporter	2.A.1: Major facilitator superfamily
CCM_07980	PF00083: Sugar transporter	KOG0254: Predicted transporter	IPR003663: Sugar/inositol transporter	2.A.1: Major facilitator superfamily
CCM_09094	PF00083: Sugar transporter	KOG0254: Predicted transporter	IPR003663: Sugar/inositol transporter	2.A.1: Major facilitator superfamily
CCM_09671	PF00083: Sugar transporter	KOG0569: Carbohydrate transporter	IPR003663: Sugar/inositol transporter	2.A.1: Major facilitator superfamily
CCM_06456	PF00083: Sugar transporter	KOG0252: Inorganic phosphate transporter	IPR005828: Sugar transporter	2.A.1: Major facilitator superfamily
CCM_04581	PF00083: Sugar transporter	KOG0252: Inorganic phosphate transporter	IPR005828: Sugar transporter	2.A.1: Major facilitator superfamily
CCM_02083	PF00083: Sugar transporter	KOG0254: Predicted transporter	IPR005828: Sugar transporter	2.A.1: Major facilitator superfamily
CCM_01139	PF00083: Sugar transporter	KOG0254: Predicted transporter	IPR005828: Sugar transporter	2.A.1: Major facilitator superfamily
CCM_09544	PF00083: Sugar transporter	KOG0254: Predicted transporter	IPR005828: Sugar transporter	2.A.1: Major facilitator superfamily
CCM_06039	PF00083: Sugar transporter	KOG0254: Predicted transporter	IPR005828: Sugar transporter	2.A.1: Major facilitator superfamily
CCM_08600	PF00083: Sugar transporter	KOG0254: Predicted transporter	IPR005828: Sugar transporter	2.A.1: Major facilitator superfamily
CCM_01120	PF00083: Sugar transporter	KOG0254: Predicted transporter	IPR005828: Sugar transporter	2.A.1: Major facilitator superfamily
CCM_05297		KOG0254: Predicted transporter	IPR005828: Sugar transporter	2.A.1: Major facilitator superfamily
CCM_03592				2.A.1: Major facilitator superfamily
CCM_05651				2.A.1: Major facilitator superfamily
CCM_09518				2.A.1: Major facilitator superfamily
CCM_03480				2.A.1: Major facilitator superfamily
CCM_04643				2.A.1: Major facilitator superfamily
CCM_06052				2.A.1: Major facilitator superfamily
CCM_00002				2.A.1: Major facilitator superfamily
CCM_07432				2.A.1: Major facilitator superfamily
CCM_05263				2.A.16: Dicarboxylate transporter family
CCM_00013				2.A.2: Glycoside symporter family
CCM_04743				2.A.2: Glycoside symporter family
CCM_05926				2.A.2: Glycoside symporter family
CCM_08224				2.A.29: Mitochondrial carrier superfamily
CCM_07673				2.A.50: Glycerol uptake transporter family
CCM_01038		KOG1441: Carbohydrate transporter	IPR004853: Sugar phosphate transporter	2.A.7: Drug/metabolite transporter superfamily
CCM_00266		KOG1441: Carbohydrate transporter	IPR004853: Sugar phosphate transporter	2.A.7: Drug/metabolite transporter superfamily
CCM_09563		KOG1441: Carbohydrate transporter	IPR004853: Sugar phosphate transporter	2.A.7: Drug/metabolite transporter superfamily
CCM_00156		KOG1444: Nucleotide-sugar transporter	IPR004853: Sugar phosphate transporter	2.A.7: Drug/metabolite transporter superfamily
CCM_00449		KOG1444: Nucleotide-sugar transporter	IPR004853: Sugar phosphate transporter	2.A.7: Drug/metabolite transporter superfamily
CCM_01719		KOG2234: UDP-galactose transporter	IPR007271: Nucleotide-sugar transporter	2.A.7: Drug/metabolite transporter superfamily
CCM_07068				2.A.7: Drug/metabolite transporter superfamily
CCM_02414				2.A.7: Drug/metabolite transporter superfamily
CCM_05803				2.A.7: Drug/metabolite transporter superfamily
CCM_07990				2.A.96: Acetate uptake transporter family
CCM_07625				2.A.96: Acetate uptake transporter family
CCM_07408		KOG1441: Carbohydrate transporter	IPR004853: Sugar phosphate transporter
CCM_07420		KOG1441: Carbohydrate transporter	IPR004853: Sugar phosphate transporter
CCM_07725		KOG1441: Carbohydrate transporter	IPR004853: Sugar phosphate transporter
CCM_00851		KOG0252: Inorganic phosphate transporter	IPR005829: Sugar transporter
CCM_05810		KOG0769: Mitochondrial carrier protein	IPR005829: Sugar transporter
CCM_02068			IPR005829: Sugar transporter
CCM_04459			IPR005829: Sugar transporter
CCM_09352			IPR005829: Sugar transporter
CCM_03338		KOG0254: Predicted transporter	IPR011701: Major facilitator superfamily
CCM_07086		KOG4332: Sugar transporter

## Sheet: Table S2
Table S2: Significantly expressed sugar transporter unigenes across three experimental sets of the sucrose, glucose and xylose cultures.
Candadate Sugar Transporter	Mapped unigene	Expresion value (FPKM)			Differential expressed genes (DEGs) in Xylose compared to Glucose			Differential expressed genes (DEGs) in Xylose compared to Sucrose
		Glucose	Sucrose	Xylose	log2FoldChange(Xylose/Glucose)	FDR (Xylose/Glucose)	DEGs (Xylose/Glucose)	log2FoldChange(Xylose/Sucrose)	FDR (Xylose/Sucrose)	DEGs (Xylose/Sucrose)
CCM_06358	Unigene4343	0.39	1.58	1170.18	11.551	0	Up	9.53259	0	Up
CCM_09215	Unigene4189	2.15	1.34	146.79	6.09327	0	Up	6.77538	0	Up
CCM_06864	Unigene5312	50	31.39	140	1.48543	7.02345e-215	Up	2.15705	0	Up
CCM_05984	CL1425.Contig1	16.02	16.71	63.15	1.97891	5.55782e-185	Up	1.91807	6.06516e-178	Up
CCM_04942	CL452.Contig13	1.22	0.8	4.58	1.90847	8.1759e-17	Up	2.51728	4.81369e-24	Up
CCM_04942	CL452.Contig8	1.67	0.01	3.68	1.13986	6.28781e-07	Up	8.52356	6.86724e-40	Up
CCM_04942	CL452.Contig4	0.01	0.01	1.55	7.27612	6.26578e-17	Up	7.27612	4.06291e-17	Up
CCM_04942	CL452.Contig17	0.01	0.01	0.41	5.35755	0.000189798	Up	5.35755	0.000141863	Up
CCM_06052	Unigene1320	273.55	243.11	529.21	0.952036	0	*	1.12223	0	Up
CCM_03527	CL857.Contig1	13.65	6.25	13.52	-0.0138058	0.938179	*	1.11317	5.86893e-13	Up
CCM_08090	CL616.Contig4	4.37	3.36	7.08	0.696116	0.0002313	*	1.07529	3.17009e-08	Up
CCM_08090	CL616.Contig5	3.15	1.46	5.08	0.689477	0.00767346	*	1.79886	2.55973e-10	Up
CCM_04946	Unigene7917	725.07	717.29	302.54	-1.26099	0	Down	-1.24543	0	Down
CCM_07760	Unigene1470	26.49	38.25	12.27	-1.11031	2.80506e-27	Down	-1.64032	2.91202e-70	Down
CCM_01139	Unigene839	7.94	11.52	3.58	-1.14918	2.25403e-15	Down	-1.68611	9.71662e-39	Down
CCM_00851	Unigene7195	8.98	7.75	1.13	-2.99039	2.28418e-31	Down	-2.77787	2.468e-25	Down
CCM_07420	CL861.Contig1	3.01	5.73	0.88	-1.77419	3.39639e-17	Down	-2.70296	1.95551e-53	Down
CCM_04942	CL452.Contig5	5.41	2.65	0.77	-2.8127	1.8716e-30	Down	-1.78306	2.43915e-09	Down
CCM_04942	CL452.Contig9	1.19	4.53	0.01	-6.89482	1.76756e-12	Down	-8.82337	1.8365e-48	Down
CCM_01166	Unigene3010	76.53	216.74	42.14	-0.860835	5.06122e-87	*	-2.3627	0	Down
CCM_05726	Unigene133	54.86	101.66	36	-0.607758	3.81372e-47	*	-1.49768	0	Down
CCM_01120	Unigene1269	34.97	43.36	21.34	-0.712558	2.14529e-19	*	-1.0228	2.18346e-43	Down
CCM_08696	Unigene2683	13.38	63.13	12.76	-0.0684498	0.606678	*	-2.3067	1.03485e-259	Down
CCM_03527	CL857.Contig2	1.62	5.09	2.1	0.374396	0.367387	*	-1.27728	1.15965e-06	Down
CCM_06741	Unigene4130	3.26	7.35	2.08	-0.648288	0.0418901	*	-1.82116	2.44874e-15	Down
CCM_09094	Unigene4218	2.21	4.14	0.62	-1.83371	0.00837648	*	-2.73929	6.33625e-07	Down
CCM_08090	CL616.Contig1	0.15	2.28	0.33	1.1375	0.559131	*	-2.7885	1.07742e-06	Down
CCM_00002	Unigene6609	73.73	150.06	195.43	1.40633	0	Up	0.381112	1.16882e-36	*
CCM_01719	CL1340.Contig1	1.88	4.64	5.97	1.667	1.12569e-13	Up	0.363606	0.0644185	*
CCM_03623	Unigene4152	0.91	3.65	3.75	2.04295	0.000776585	Up	0.0389941	0.940906	*
CCM_04942	CL452.Contig12	0.02	3.69	2.12	6.72792	2.25734e-22	Up	-0.799557	0.000261047	*
CCM_04942	CL452.Contig10	3.07	0.04	0.01	-8.26209	8.6653e-33	Down	-2	0.598504	*
CCM_04942	CL452.Contig15	1.15	0.3	0.01	-6.84549	6.62581e-12	Down	-4.90689	0.00276811	*
CCM_04896	Unigene6578	464.07	346.12	346.31	-0.422278	2.73224e-92	*	0.000791739	0.945624	*
CCM_00266	Unigene1072	237.36	206.25	199.42	-0.251267	1.28283e-23	*	-0.048584	0.102192	*
CCM_07625	Unigene2241	210.65	173.65	191.96	-0.134042	0.00110856	*	0.144623	0.000531416	*
CCM_08999	Unigene4527	171.11	189.78	149.4	-0.195744	4.71086e-15	*	-0.345148	3.94922e-47	*
CCM_02083	Unigene7496	162.25	133.59	139.74	-0.215473	1.33446e-11	*	0.064933	0.0686888	*
CCM_05298	Unigene4495	65.48	221.01	127.9	0.96589	2.46322e-106	*	-0.789095	6.84454e-130	*
CCM_06039	CL356.Contig2	128.11	160.29	125.61	-0.0284318	0.75027	*	-0.351733	5.41858e-07	*
CCM_05803	Unigene6620	114.77	99.88	107.02	-0.100865	0.0265607	*	0.0996127	0.0275484	*
CCM_04459	Unigene5392	77.12	67.43	98.8	0.357406	8.70669e-11	*	0.55112	2.27964e-23	*
CCM_07588	Unigene4980	65.21	69.74	91.98	0.496227	3.01639e-23	*	0.399334	3.51619e-16	*
CCM_05651	Unigene7423	76.91	101.64	91.8	0.255323	7.14443e-08	*	-0.146902	0.00126607	*
CCM_06039	CL356.Contig3	73.49	55.11	51.87	-0.502648	1.08044e-06	*	-0.0874138	0.499833	*
CCM_05810	Unigene4305	56.28	70.5	49.13	-0.196018	0.0270258	*	-0.521019	8.26413e-12	*
CCM_04743	CL1569.Contig1	37.17	27.31	42.06	0.17831	0.000232723	*	0.62302	1.14136e-37	*
CCM_00156	Unigene5471	59.98	63.92	41.28	-0.539039	1.34458e-17	*	-0.630824	1.64736e-24	*
CCM_07408	CL1374.Contig2	44.92	45.78	41.09	-0.128571	0.18072	*	-0.15593	0.0866667	*
CCM_01038	CL2026.Contig1	51.06	42.3	40.93	-0.319035	2.1059e-06	*	-0.047499	0.57165	*
CCM_00013	Unigene2526	36.94	30.61	37.03	0.00351068	0.979332	*	0.274692	4.6878e-06	*
CCM_06039	CL356.Contig1	34.48	36.8	36.84	0.0955133	0.507575	*	0.0015673	0.962214	*
CCM_07408	CL1374.Contig1	39.44	37.09	33.45	-0.237653	0.0122155	*	-0.149024	0.134933	*
CCM_09671	CL1892.Contig2	31.5	28.02	33.15	0.073657	0.406884	*	0.242552	0.00145958	*
CCM_09671	CL1892.Contig1	27.77	29.11	32.08	0.208147	0.00910235	*	0.140159	0.0730835	*
CCM_00222	CL230.Contig1	30.57	34.69	31.87	0.0600825	0.446373	*	-0.122321	0.0663479	*
CCM_08224	Unigene5435	37.92	43.83	31.46	-0.26944	0.00464414	*	-0.4784	3.05078e-08	*
CCM_07432	CL1853.Contig2	21.89	42.48	30.43	0.475222	1.83504e-08	*	-0.481289	9.63402e-12	*
CCM_03338	CL1865.Contig2	28.93	39.92	30.01	0.052877	0.648442	*	-0.411668	5.75391e-07	*
CCM_07725	CL2250.Contig1	32.78	34.89	28.2	-0.217121	0.00306804	*	-0.307118	8.64426e-06	*
CCM_05926	Unigene5805	29.75	26.12	26.44	-0.170167	0.0827251	*	0.0175673	0.861966	*
CCM_07725	CL2250.Contig2	37.28	35.16	25.91	-0.524893	2.19018e-14	*	-0.440426	3.35432e-10	*
CCM_00728	Unigene7088	28.2	32.14	25.39	-0.151435	0.126412	*	-0.34011	7.20607e-05	*
CCM_07674	Unigene3678	31.36	23.6	25.31	-0.309218	0.000191952	*	0.100921	0.291351	*
CCM_01038	CL2026.Contig2	24.82	24.9	23.35	-0.0880806	0.432204	*	-0.0927232	0.383519	*
CCM_03592	Unigene2902	22.24	19.51	22.87	0.0402996	0.729385	*	0.229243	0.0148696	*
CCM_09563	CL1365.Contig1	27.54	19.19	22.65	-0.282018	0.0103871	*	0.239156	0.0487498	*
CCM_07673	Unigene6569	30.93	22.23	22.61	-0.452046	1.84709e-10	*	0.024453	0.785978	*
CCM_04459	Unigene556	21.34	19.04	22.53	0.0782871	0.44238	*	0.242814	0.00556894	*
CCM_09026	Unigene7090	14.7	10.97	20.89	0.506996	1.2126e-05	*	0.929249	5.89721e-15	*
CCM_01719	CL1340.Contig2	22.4	19.36	17.99	-0.316304	0.00137373	*	-0.105884	0.349746	*
CCM_02140	Unigene1317	25.5	25.01	17.96	-0.50571	9.67902e-08	*	-0.477718	4.98478e-07	*
CCM_02414	Unigene5436	14.66	12.89	17.91	0.28888	0.0437715	*	0.474513	0.000477773	*
CCM_01532	Unigene5417	17.33	20.08	17.74	0.0337344	0.840531	*	-0.178753	0.173028	*
CCM_04581	Unigene5685	26.16	25.96	17.69	-0.564428	2.2283e-11	*	-0.553356	5.00255e-11	*
CCM_05984	CL1425.Contig4	14.08	16.15	15.49	0.13769	0.0394091	*	-0.060197	0.367134	*
CCM_05926	Unigene7554	18.97	13.53	14.63	-0.37479	0.0297502	*	0.112768	0.570336	*
CCM_09563	CL1365.Contig2	14.47	15.99	14.38	-0.00900125	0.965695	*	-0.153106	0.242487	*
CCM_05984	CL1425.Contig3	13.34	14.74	13.09	-0.0272936	0.743338	*	-0.171271	0.00853441	*
CCM_07490	Unigene6931	14.76	12.4	11.65	-0.341363	0.00882571	*	-0.0900102	0.552382	*
CCM_04643	Unigene1301	9.42	12.38	11.31	0.2638	0.101947	*	-0.130412	0.396546	*
CCM_07420	CL861.Contig2	13.54	8.29	10.17	-0.412908	3.34998e-07	*	0.294876	0.00145626	*
CCM_08598	Unigene7077	15.45	10.01	10.15	-0.606127	5.4175e-06	*	0.0200378	0.906221	*
CCM_02068	Unigene4853	14.18	10.91	10.12	-0.486648	2.03954e-11	*	-0.108442	0.218122	*
CCM_03115	CL1111.Contig2	6.38	5.34	9.79	0.617752	0.000240453	*	0.874469	2.54197e-07	*
CCM_08600	CL1522.Contig2	8.12	5.75	9.59	0.240051	0.150853	*	0.737969	3.08636e-06	*
CCM_07432	CL1853.Contig1	10.15	14.22	9.16	-0.14806	0.351434	*	-0.634502	3.56855e-07	*
CCM_07068	Unigene6534	7.09	5.69	8.34	0.234262	0.232168	*	0.551619	0.00235382	*
CCM_00449	CL960.Contig1	8.02	4.58	8.05	0.00538655	0.993329	*	0.813641	0.0641595	*
CCM_01080	Unigene1129	8.83	7.95	7.58	-0.220216	0.40327	*	-0.068757	0.808713	*
CCM_06002	Unigene5870	7.54	9.48	7.28	-0.0506261	0.826109	*	-0.380949	0.0278593	*
CCM_05984	CL1425.Contig5	5.34	5.22	6.43	0.267979	0.00917653	*	0.300769	0.00262258	*
CCM_04797	CL359.Contig1	6.23	3.8	5.45	-0.192976	0.306708	*	0.520257	0.00483465	*
CCM_04797	CL359.Contig2	6.32	9.77	5.13	-0.300966	0.109508	*	-0.9294	2.32919e-10	*
CCM_07980	Unigene8601	0.9	1.82	5.11	2.50533	0.0271115	*	1.48938	0.109117	*
CCM_03819	CL1894.Contig1	7.26	9.01	4.86	-0.579013	0.0296589	*	-0.890571	0.000155089	*
CCM_03819	CL1894.Contig3	7.57	7.02	4.81	-0.654256	0.00938944	*	-0.545434	0.0330597	*
CCM_02729	Unigene53	4.17	4.62	4.73	0.181793	0.38357	*	0.0339473	0.872681	*
CCM_00222	CL230.Contig2	7.08	7.25	4.42	-0.679703	7.47891e-06	*	-0.713935	1.55298e-06	*
CCM_04459	Unigene2043	3.05	3.07	4.2	0.46158	0.541947	*	0.452151	0.503731	*
CCM_08090	CL616.Contig3	2.82	3.7	4.02	0.5115	0.0823346	*	0.11967	0.687747	*
CCM_09544	Unigene1769	3.97	2.44	3.79	-0.0669412	0.922005	*	0.635317	0.0720727	*
CCM_07086	CL1779.Contig1	2.96	2.39	3.36	0.182864	0.842359	*	0.491451	0.554365	*
CCM_02098	Unigene6354	0.72	1.81	3.32	2.20511	0.0716318	*	0.875194	0.35989	*
CCM_07990	Unigene365	0.47	1.41	3.13	2.73543	0.0096226	*	1.15047	0.156555	*
CCM_00501	Unigene5655	0.96	2.81	2.69	1.4865	0.0010317	*	-0.062964	0.888067	*
CCM_06456	CL1836.Contig2	0.81	0.77	2.67	1.72085	0.0243124	*	1.79391	0.0198096	*
CCM_08090	CL616.Contig2	0.01	1.04	2.19	7.77479	0.0178897	*	1.07435	0.289403	*
CCM_02098	Unigene8583	0.01	0.01	1.77	7.46761	0.0336201	*	7.46761	0.0275462	*
CCM_00501	Unigene8148	0.31	0.62	1.59	2.35869	0.200407	*	1.35869	0.353845	*
CCM_03115	CL1111.Contig1	2.61	0.96	1.57	-0.733285	0.0337698	*	0.709658	0.105237	*
CCM_05263	Unigene8627	0.01	1.37	1.4	7.12928	0.201953	*	0.0312509	0.982719	*
CCM_03819	Unigene7200	1.87	1.61	1.38	-0.43837	0.717924	*	-0.222392	0.855036	*
CCM_08090	CL616.Contig8	0.01	1.77	1.37	7.09803	0.00499317	*	-0.369573	0.538266	*
CCM_07980	Unigene8503	0.01	0.01	1.37	7.09803	0.0620526	*	7.09803	0.0518141	*
CCM_09544	Unigene4388	2.68	0.76	1.24	-1.11189	0.0874433	*	0.706269	0.390816	*
CCM_03480	Unigene9148	0.56	1.15	1.17	1.06301	0.705537	*	0.0248747	0.983434	*
CCM_05263	Unigene8546	0.01	0.01	1.13	6.82018	0.356172	*	6.82018	0.324189	*
CCM_03819	Unigene9826	1.31	0.01	1.02	-0.360998	0.825132	*	6.67243	0.178092	*
CCM_03819	Unigene6329	1.77	2.37	0.61	-1.53687	0.181943	*	-1.95801	0.0454591	*
CCM_02098	Unigene8531	0.01	0.01	0.58	5.85798	0.607477	*	5.85798	0.572253	*
CCM_03338	Unigene4768	0.84	2.31	0.43	-0.966053	0.608069	*	-2.42548	0.0290059	*
CCM_04942	CL452.Contig18		0.12					-3.58496	0.108817	*
CCM_04942	CL452.Contig16	3.17		0.01	-8.30834	1.6953e-32	Down
CCM_00186	Unigene9991	1.13		0.01	-6.82018	0.376419	*
CCM_08090	CL616.Contig7	1.04		0.01	-6.70044	0.0119593	*
CCM_03480	Unigene9436	0.59		0.01	-5.88264	0.629279	*
CCM_08090	CL616.Contig9	0.33		0.01	-5.04439	0.378026	*

## Sheet: Table S3
Table S3: A list of proteins sequences used for structural motif analysis.
Uniprot ID	Sequence
CCM_06358	MAFLSFDQRKSWMVAARLQKRRLLIAVNLLAGMSIFFFGYDQGLMGGVNQSIDYVERMGLGRLAADGSLVIEKTLVQGGTMAIFYLGTLVGCLAGGALGDRHGRIGTIGVGAVWAIFGASLQAAAQNPAWMLGSRFVNGIGTGVLNGIVPAWASELSEHTSRGTFIAMEFTLNILGVVVAYWIAYGVSFIDGGASPVRWRFPVAFQILPLLCLVAGCWAFPESPRWLVKAGRDDEALHVLRRLRGVEDGRAEAEYNDIRSVLELEKSAEGTSYLHMLFGRKSGRLHTGRRVQLVIWLQIIQCWTGIAGVTMYGPTIFQIAGFGADKTQWVAGLNNIFYMFSTLICVFTIDRIGRRMTLYWGSVCQAIAMVLVGGLSRGGLNARHRGDISTANAWGAAAA…
P0AGF4_XylE_Ecoli	MNTQYNSSYIFSITLVATLGGLLFGYDTAVISGTVESLNTVFVAPQNLSESAANSLLGFCVASALIGCIIGGALGGYCSNRFGRRDSLKIAAVLFFISGVGSAWPELGFTSINPDNTVPVYLAGYVPEFVIYRIIGGIGVGLASMLSPMYIAELAPAHIRGKLVSFNQFAIIFGQLLVYCVNYFIARSGDASWLNTDGWRYMFASECIPALLFLMLLYTVPESPRWLMSRGKQEQAEGILRKIMGNTLATQAVQEIKHSLDHGRKTGGRLLMFGVGVIVIGVMLSIFQQFVGINVVLYYAPEVFKTLGASTDIALLQTIIVGVINLTFTVLAIMTVDKFGRKPLQIIGALGMAIGMFSLGTAFYTQAPGIVALLSMLFYVAAFAMSWGPVCWVLLSEIF…
B5RT63_2C02530_Dhansenii	MGYEDKLVAPALKFRNFLDKTPNIYNVFVIASISCISGLMFGIDISSMSLFIGDDKYIKYFHKPSTTMQSFITSAMSLGSFFGSICSSFVSEPFGRRSSLMVCGFFWCVGAAIQSSAQNQAQLIIGRFISGFGVGFGSSVAPVYGSELAPRKIRGLIGGLFQFSVTLGILIMFYICYGLNFINGVASFRVAWGLQIIPGLVLILGCFFIPESPRWLAKQGYWEDAEYVVAKIQAKGNREDPDVLIEMSEIKEQIMLDEHIKAFTYADLFTKKYILRTVTACWAQAWQQLTGMNTLMYYIVYVFQMAGYEGDANLVASSIQYCLNTGMTIPALYFMDKLGRRPVLLTGAAFMMAWQFAVGGLLATYSVDNPISETVRIQIPEEHGKAAKAVIACCYLFVV…
Q6BTD8_2D01474_Dhansenii	MGLEDNALIRKYVNVGEKRAGSASMGIFVGAFAAFGGVLFGYDTGTISGIMAMNYVKGEFPANKESFTSKESSLIVSILSAGTFFGALLAPFMSDTLGRRWSLIISTFIVFNLGVILQTVSTGIPLLCAGRAIAGFGVGLISAVIPLYQSEATPKWIRGAVVSCYQWAITIGLLLAACVNQGTHNRNDSGSYRIPIAVQLLWSLILGTGMIFLPDTPRFWIHKGNESEAKKSLKILRKLPLDHPDLIEEYEDIKAAYDFECSFGKSSWMDLFTTRNRQLKRLFTGVALQAFQQLTGVNFIFYFGTSFFKSAGIENEFLISLATSIVNVGMTVPGIFLIELVGRRSMLLWGAVGMSVSQFIVAIVGIATDSADANKVLIAFTCFFIAFFASTWGPIAWVV…
Q7SEB3_An25_Ncrassa	MAPPKFLGLSGRPLSLAVSTVATTGFLLFGYDQGVMSGIITAPAFNNFFTPTKDNSTMQGLITAIYEIGCLIGAMFVLWTGDLLGRRRNIMVGAFIMALGVIIQVTCQAGSNPFAQLFVGRVVMGIGNGMNTSTIPTYQAECSKTSNRGLLICIEGGVIAFGTLIAYWIDYGASYGPDDLVWRFPIAFQLLFAIFICVPMFYLPESPRWLLSHGRTQEADKVIAALRGYEIDGPETIQERNLIVDSLRASGGFGQKSTPFKALFTGGKTQHFRRLLLGSSSQFMQQVGGCNAVIYYFPILFQDSIGESHNMSMLLGGINMIVYSIFATVSWFAIERVGRRRLFLIGTVGQMLSMVIVFACLIPDDPMKARGAAVGLFTYIAFFGATWLPLPWLYPAEVN…
Q7S3Q4_An29-2_Ncrassa	MGLSLKKPEGVPGKSWPAIVIGLFVAFGGVLFGYDTGTIGGILAMPYWQDLFSTGYRNPEHHLDVTASQSATIVSILSAGTFFGALGAAPLADWAGRRLGLILSSFVFIFGVILQTAAVSIPLFLAGRFFAGLGVGLISATIPLYQSETAPKWIRGVIVGSYQLAITIGLLLASIVNNATHNMQNTGCYRIPIAVQFAWAIILIVGMIILPETPRFHIKRDNLPAATRSLAILRRLEQNHPAIIEELSEIQANHEFEKSLGKATYLDCLKGNLLKRLLTGCFLQSLQQLTGINFIFYYGTQFFKNSGFSDSFLISLITNLVNVVSTLPGLYAIDKWGRRPVLLWGAVGMCVCQFIVAILGTTTTSQDASGMIIVHNLAAQKAAIAFICFYIFFFAASWG…
Q0WWW9_At5g59250_Athaliana	MAFAVSVQSHFAIRALKRDHFKNPSPRTFCSCFKSRPDSSYLSLKERTCFVSKPGLVTTRYRHIFQVGAETGGEFADSGEVADSLASDAPESFSWSSVILPFIFPALGGLLFGYDIGATSGATLSLQSPALSGTTWFNFSPVQLGLVVSGSLYGALLGSISVYGVADFLGRRRELIIAAVLYLLGSLITGCAPDLNILLVGRLLYGFGIGLAMHGAPLYIAETCPSQIRGTLISLKELFIVLGILLGFSVGSFQIDVVGGWRYMYGFGTPVALLMGLGMWSLPASPRWLLLRAVQGKGQLQEYKEKAMLALSKLRGRPPGDKISEKLVDDAYLSVKTAYEDEKSGGNFLEVFQGPNLKALTIGGGLVLFQQITGQPSVLYYAGSILQTAGFSAAADATR…
Q2MDH1_Gfx1_Cintermedia	MSQDSHSSGAATPVNGSILEKEKEDSPVLQVDAPQKGFKDYIVISIFCFMVAFGGFVFGFDTGTISGFVNMSDFKDRFGQHHADGTPYLSDVRVGLMISIFNVGCAVGGIFLCKVADVWGRRIGLMFSMAVYVVGIIIQISSSTKWYQFFIGRLIAGLAVGTVSVVSPLFISEVSPKQIRGTLVCCFQLCITLGIFLGYCTTYGTKTYTDSRQWRIPLGLCFAWAILLVVGMLNMPESPRYLVEKHRIDEAKRSIARSNKIPEEDPFVYTEVQLIQAGIEREALAGQASWKELITGKPKIFRRVIMGIMLQSLQQLTGDNYFFYYGTTIFQAVGLKDSFQTSIILGIVNFASTFVGIYVIERLGRRLCLLTGSAAMFICFIIYSLIGTQHLYKQGYSNE…
Q2MEV7_Gxs1_Cintermedia	MGLEDNRMVKRFVNVGEKKAGSTAMAIIVGLFAASGGVLFGYDTGTISGVMTMDYVLARYPSNKHSFTADESSLIVSILSVGTFFGALCAPFLNDTLGRRWCLILSALIVFNIGAILQVISTAIPLLCAGRVIAGFGVGLISATIPLYQSETAPKWIRGAIVSCYQWAITIGLFLASCVNKGTEHMTNSGSYRIPLAIQCLWGLILGIGMIFLPETPRFWISKGNQEKAAESLARLRKLPIDHPDSLEELRDITAAYEFETVYGKSSWSQVFSHKNHQLKRLFTGVAIQAFQQLTGVNFIFYYGTTFFKRAGVNGFTISLATNIVNVGSTIPGILLMEVLGRRNMLMGGATGMSLSQLIVAIVGVATSENNKSSQSVLVAFSCIFIAFFAATWGPCAWV…
A3LUN6_Hxt2p6_Sstipitis	MSQSKEKSNVITTVLSEELPVKYSEEISDYVYHDQHWWKYNHFRKLHWYIFVLTLTSTNNGYDGSMLNGLQSLSTWKDAMGNPEGYILGALANGTIFGGVLAVAFASWACDRFGRKLTTCFGSIVTVIGAILQGASTNYAFFFVSRMVIGFGFGLASVASPTLIAELSFPTYRPTCTALYNVFWYLGAVIAAWVTYGTRTIVSAYSWRIPSYLQGLLPLVQVCLVWWVPESPRFLVSKGKIEKAREFLIKFHTGNDTQEQATRLVEFELKEIEAALEMEKINSNSKYTDFITIKTFRKRIFLVAFTACMTQLSGNGLVSYYLSKVLISIGITGEKEQLQINGCLMIYNLVLSLAVAFTCYLFRRKALFIFSCSFMLLSYVIWTILSAINQQRNFEQKGL…
A5DNP0_Mgt04891_Mguilliermondii	MGLEDNALVRKYVNVGEKKAGSTGMGIFVGLFAAFGGILFGYDTGTIGGILGMKYVTERFPQDWKHDKGVPQHTFSSSEKSLIVSILSVGTFFGSLLAPLLNDTLGRRYTLIISSLLVFNLGVILQAAATAIPLFCAGRAIAGFGVGLISSCVPLYQSECTPKWIRGAVVSLYQWAITIGLLLAACVNQGTKNRNDSGSYRIPISIQFLWSLILGIGMILLPESPRFYIHVGKDDKAKDSLRRLRKLPIDHPDLIEEYMDIKAAYEFECSFGKPSLAMLFSRNNKQFKRLMTGIWLQAFQQLTGVNFIFYYGTTFFQSAGIKNEFLISLATNIVNVGMTIPGVIAIELVGRRNLLLIGAAGMSISQLIVAIVGVAASSKAANQVLVAFSCIFIAFFAST…
A5DPJ5_Mgt05196_Mguilliermondii	MSSNEQVTPRVSEDNLDGKKSMETPQSPSDIPTTKDITAEQPTLPEKSLKDYISISLFCILVAFGGFVFGFDTGTISGFVNMTDYKRRFGTLQSDGTYGFTDTRTGVIVAIFNAGCAIGGIFLSKIADVAGRRMGLMFSMIIYVIGIIVQITSTTKWYQIVIGRAIAGLAVGCVSVLSPLFIGETAPKMLRGTLVCSFQLFITMGIFLGYCTTYGTKQYDDARQWRIPLGLCFAWAALLVGGMLAMPESPRYLIEKNKIDEAKKSLAKSNKVHVDDPAIYTEVQLIHAGIERERLAGSASWTQLLFGKPRIFERVLTGVVLQSMQQLTGNNYFFYYGTTIFKAVGMADSFQTSIVLGIVNFASTFVGIYAIERLGRRMCLLIGSVWMTICFIIYSVLGS…
A5DPU2_Mgt05293_Mguilliermondii	MSQQELDSGVQTPINNDSLLVKDDKPEEEEEALPTLDDSDKKHIAVSIFCLLIAFGGFVFGFDTGTISGFVNMPDFKQRFGQLEHDEYTLSNVRTGLMVAIFNIGCAVGGIFLSKVADMYGRRVGLMFSMLIYVIGIIVQISSSDKWYQICIGRAITGLSVGIVSVLCPLFIGESAPKKLRGTLVVVFQLFITLGIFLGYCTTYGTKTYDDSRQWRIPLGLCFAWAILLVSGMLLMPESPRYLIEKNKIEEAKKSIARSNSTTPDNPAVYTEVQLIQAGIEREKIAGNASWTQLITGKPKILSRVIMGIMLQSLQQLTGDNYFFYYGTTIFKAVGLQDSFETSIILGVVNFASTFLGIYVIDRYGRRKCLLTGSACMFVCFIIYSVLGSVNLYNNGYDD…
A5DRF9_Mgt05860_Mguilliermondii	MGYEDKLVAPALKFRNFIDRTPNTYNVYVIASISCISGAMFGFDISSMSVFVGQTPYLNFFHSPKSDLQGFITAAMSLGSFFGSLLSSFVSEPFGRRASLLICGFLWCVGAAIQCSSQNVAQLIIGRIISGFGVGFGSSVAPVYGSEMAPRKIRGTIGGFFQFSVTLGIFIMFLIGYGCSKIDAVGSFRIPWGVQIVPGLFLLLGCFFIPESPRWLAKQGYWEEAEIIVANIQAKGNREDPDVLIEISEIKEQLLLDEHAKAFTYADLFSKKYLPRTITAISAQIWQQLTGMNVMMYYIVYIFQMAGYEGDTNLIPSLIQYIINTVVTIPSLYLLDRVGRRKMLLFGAAAMMAWQFGVAGILATYSEPYDLNDTVKITIPDKHKSAAKGVIACCYLFVA…
A3LYX8_Qup2_Sstipitis	MVVVALTAAFAAVIIGYDAGFVGGTVALESFQDEFNMPSMTAKERSNISANVVSVFQAGAFWGAIFFYPIGELLGRKIGLCLSGFFLTFGAAISLYSKSSTGLGAIYAGRVLTGIGIGGCSGLAPIYISESSPALIRGKLVGMWEMSWQVGGVVGYWINYGVLQNIPDSRKQWLIPFAIQLVPSGMFWAGSFLIPESPRYLVHRGQMEQARKNLSFLRNLPVDHPYSIHEMENIVKDINDKKAKLGSDGFFAPFKKVLSSKKILYRLLLTTSLFPMQNGSGINAITYYSPTVFKSFGIDATKAGLQSTGVFGLLKAFASLVWLFLVVDRFGRKTALVWGSVPCSLCMWYIGAYVKIANPSQRVANGNTTQDAGGKAAQAMLYIWTLFYGASWNGTPWVF…
A3M0N3_Rgt2_Sstipitis	MGLEDSALLQKYINFGEKKAGSTTMGICVGLFAAFGGILFGYDTGTISGIMAMDYVTARFPSNHQSFSSSESSLIVSILSVGTFFGSLSASFISDRLGRRLTLMISTLIIFNVGIILQTASTSIPLLCVGRVLAGLGVGLISAVIPLYQAETVPKWIRGAVVSCYQWAITLGLLLAAVVNQGTHNRNDSGSYRIPIAIQFLWALILGGGMCLLPETPRFWVSKGDNDRAKDSLRRLRKLPLDHPDLIEEYEEIKANYEYEAQYGSGSWSQVFANKNHQRKRLAMGVGIQALQQLTGINFIFYYGTNFFKGSGIKNEFLIQMATNIVNFGSTVPGILLVEIIGRRKLLLGGSAVMSISQLIVAIVGVAAGEGSTSANKCLVAFVCIFIAAFAATWGPLCW…
50894_Str1_Treesei	MGAHTDSGAAIYDAALHRRQALMGASGARALVKNFRVFSLAAFACIGGVLYGYNQGMFSGVLAMPSFKQHMGEYDPFDPNASQTKKGWLTAILELGAWFGTLFSGFMAETISRKYGIIVACCIFIIGVVVQACAIDAGPNAILGGRFVTGMGVGSLSMIVPIYNSEVAPPEVRGALVALQQFAICFGIMVSFWIDYGTNYIGGTELGKQSEAAWLVPVCLQIAPCLFLLVGMLFMPFSPRWLIHHNREDEAKRILSTLRGLPMDHELVELEFLEIKAQSLFEKRSIAEQFPHLREQTAWNNFKLQFVAIKSLFQKKSMLKRCAVAGITMFFQQWTGINAVLYYAPTIFQQLGQTDNTVSLLATGVVGIVMFVATAPAVLWIDRIGRKPVLITGAIGMAT…
O94155_Sut1_Sstipitis	MSSQDIPSGVQTPSNASFLEKDEDKIEEVPQNHDATLVALESKGISEYLLICFFCLLVAFGGFVFGFDTGTISGFVNMSDFLERFGQTRADGTHYLSNVRVGLLVSIFNIGCAIGGIFLSKIGDVYGRRVGIMASMVIYVVGIIVQIASQHAWYQVMIGRAITGLAVGTVSVLSPLFIGESSPKHLRGTLVYCFQLCITLGIFIGYCVTYGTKRLSDSRQWRVPLGLCFLWAIFLVVGMLAMPESPRYLVEKKRIEDAKKSVARSNKLSPEDPSVYTEIQLIQAGIDREAIAGSASWTELITGKPAIFRRVVMGIIMQSLQQLTGVNYFFYYGTTIFQAVGLKDSFQTSIILGVVNFAATFIGIWAIERFGRRSCLLVGSAGMFVCFIIYSTIGSFHLY…
O94151_Sut2_Sstipitis	MSSQDLPSGAQTPIDGSSILEDKVEQSSSSNSQSDLASIPATGIKAYLLVCFFCMLVAFGGFVFGFDTGTISGFLNMSDFLSRFGQDGSEGKYLSDIRVGLIVSIFNIGCAIGGIFLSKIGDVYGRRIGIISAMVVYVVGIIIQISSQDKWYQLTIGRGVTGLAVGTVSVLSPMFISESAPKHLRGTLVYCYQLCITLGIFIGYCVTYGTKDLNDSRQWRVPLGLCFLWAIFLVVGMLAMPESPRFLIEKKRIEEAKKSLARSNKLSPEDPGVYTEVQLIQAGIDREAAAGSASWMELITGKPAIFRRVIMGIILQSLQQLTGVNYFFYYGTTIFQAVGLQDSFQTSIILGTVNFLSTFVGIWAIERFGRRQCLLVGSAGMFVCFIIYSVIGTTHLFID…
Q9UWF5_Sut3_Sstipitis	MSSQDLPSGAQTPIDGSSILEDKVEQSSSSNSQSDLASIPATGIKAYLLVCFFCMLVAFGGFVFGFDTGTISGFLNMSDFLSRFGQDGSEGKYLSDIRVGLIVSIFNIGCAIGGIFLSKIGDVYGRRIGIISAMVVYVVGIIIQISSQDKWYQLTIGRGVTGLAVGTVSVLSPMFISESAPKHLRGTLVYCYQLCITLGIFIGYCVTYGTKDLNDSRQWRVPLGLCFLWAIFLVVGMLAMPESPRFLIEKKRIEEAKKSLARSNKLSPEDPGVYTELQLIQAGIDREAAAGSASWMELITGKPAIFRRVIMGIILQSLQQLTGVNYFFYYGTTIFQAVGLQDSFQTSIILGTVNFLSTFVGIWAIERFGRRQCLLVGSAGMFVCFIIYSVIGTTHLFID…
AN0250_XtrD_Anidulans	MGGAGDTSAALDAAAQIRKVNLKASSGLPGLIQNKKVFGVAMFACLGGLLYGYNQGVFSGVLVMHSFEEHMGDAVTNETKKGWLTSILELGAWLGALYSGVLCERFSRKYTILAHVCIFCIGVVIQLTAAAGSGSSSNILGGRFVTGMGVGSLSMSVPMYNAEIAPPEVRGSLVAMQQLAITFGIMVSFWINYGTNHIGGTGETQKDTAWLLPLALQLVPAVILGVGMIFMPFSPRWLVHHGREEEALKVLTSLRGLEADDPVLQLEFLEIKAQSVFEKRTEKERFPHLERSSLWSYLKLEAAGYKSLFTSWPMFKRVIVATVTMTFQQWTGVNAILYYAPTIFEQLGMSSNTTSLLATGVVGVAMFLATIPAVIWVDNVGRKPILLIGAIGMAACHFI…
A3LY10_Xut1_Sstipitis	MHGGGDGNDITEIIAARRLQIAGKSGVAGLVANSRSFFIAVFASLGGLVYGYNQGMFGQISGMYSFSKAIGVEKIQDNPTLQGLLTSILELGAWVGVLMNGYIADRLGRKKSVVVGVFFFFIGVIVQAVARGGNYDYILGGRFVVGIGVGILSMVVPLYNAEVSPPEIRGSLVALQQLAITFGIMISYWITYGTNYIGGTGSGQSKASWLVPICIQLVPALLLGVGIFFMPESPRWLMNEDREDECLSVLSNLRSLSKEDTLVQMEFLEMKAQKLFERELSAKYFPHLQDGSAKSNFLIGFNQYKSMITHYPTFKRVAVACLIMTFQQWTGVNFILYYAPFIFSSLGLSGNTISLLASGVVGIVMFLATIPAVLWVDRLGRKPVLISGAIIMGICHFVV…
Q64L87_XylHP_Dfabryi	MSKDPLVFSIIAFASIGGLLFGYDTGVISGIVTMESFAAKFPRIYMDPDYKGWFVSTFLLCAWFGSLINSPIVDKFGRRDTIRIACVVFVIGSVFQCAGISVSMLFAGRAVAGIGVGQLTMVVPMYMSELAPPSVRGGLVVIQQLSITIGILISFWINYGTQFIGGTKCAPGRNYQGDVFDPYVDVPKQGCNGQQDASWRIPFGLQIAPAFLLGIGMTFFPRSPRWLLSKNREEEAWKSLHYLRRRNNPDMIEAEFNEIRSDVIFEKKYNEKRFPGKEGISLYVSSYWDLFSTKSNFKRVFIGSAVMFFQQFIGCNAIIYYAPTIFSQLGMDSNTTALLGTGVYGIVNCISTIPAIFAIDKFGRKTLLMAGAAGTFVSLVIVGAIVGKYGEKLSKHKVA…
J9Q9F3_Xut6_Sstipidis	MSSVEKSAETASYTSQVSASGSAKTNSYLGLRGNKLNFAVSCFAGVGFLLLGYDQGVMGSLLTLPSFENTFPAMKASNNATLQGAVIALYEIGCMSSSLATIYLGDRLGRLKIMFIGCVIVCIGAALQASAFTIAHLTVARIITGLGTGFITSTVPVYQSECSPAKKRGQLIMMEGSLIALGIAISYWIDFGFYFLRNDGLHSSASWRAPIALQCVFAVLLISTVFFFPESPRWLLNKGRTEEAREVFSALYDLPADSEKISIQIEEIQAAIDLERQAGEGFVLKELFTQGPARNLQRVALSCWSQIMQQITGINIITYYAGTIFESYIGMSPFMSRILAALNGTEYFLVSLIAFYTVERLGRRFLLFWGAIAMALVMAGLTVTVKLAGEGNTHAGVGA…
G3XW52_MstA_Aniger	MAEGFVDASRVEAPVTLKTYLMCAFAAFGGIFFGYDSGYISGVMGMRYFIEEFEGLDYNTTPTDSFVLPSWKKSLITSILSAGTFFGALIAGDLADWFGRRTTIVSGCVVFIVGVILQTASTSLGLLVAGRLVAGFGVGFVSAIIILYMSEIAPRKVRGAIVSGYQFCITIGLMLASCVDYGTENRLDSGSYRIPIGLQLAWALILGGGLLCLPESPRYFVKKGDLAKAAEVLARVRGQPQDSDYIKDELAEIVANHEYEMQVIPEGGYFVSWMNCFRGSIFSPNSNLRRTVLGTSLQMMQQWTGVNFVFYFGTTFFQSLGTIDDPFLISMITTIVNVCSTPVSFYTIEKFGRRSLLLWGALGMVICQFIVAIVGTVDGSNKHAVSAEISFICIYIFFF…
