# Supplementary figures and images for: Probing Carbon Utilization of Cordyceps militaris by Sugar Transportome and Protein Structural Analysis
Source: MDPI journal article supplement (doi:10.3390/cells9020401), 2020-02-10

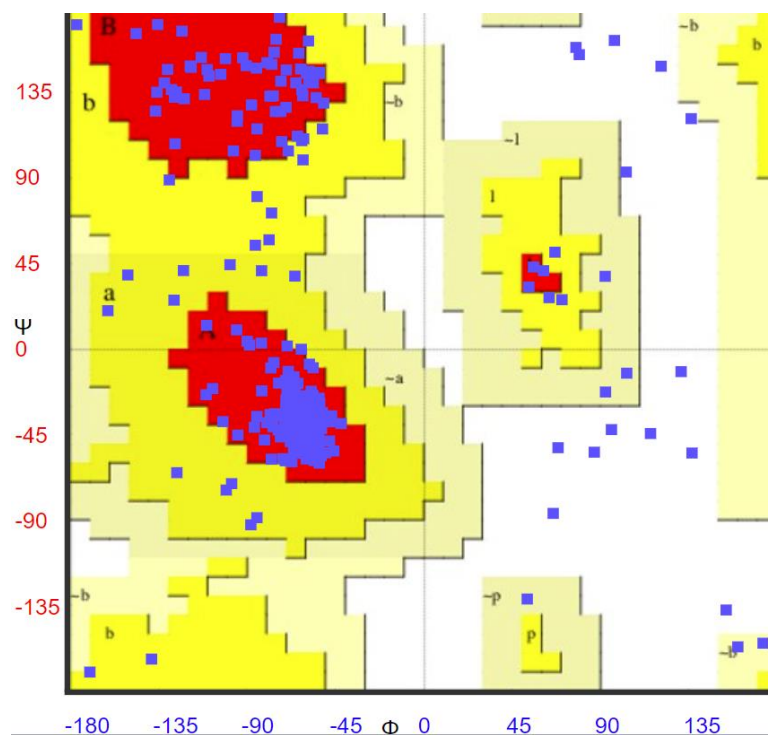

Figure S1.

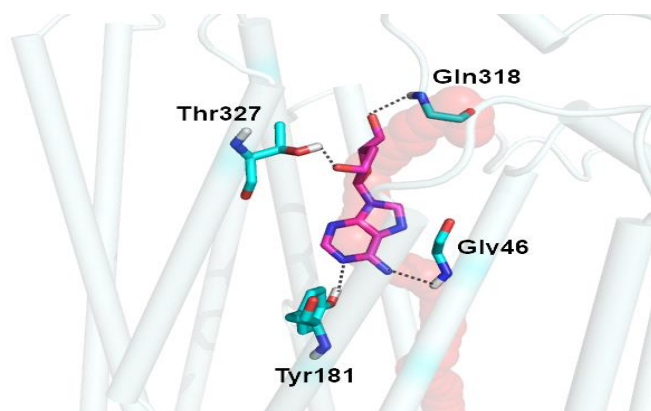

(A)

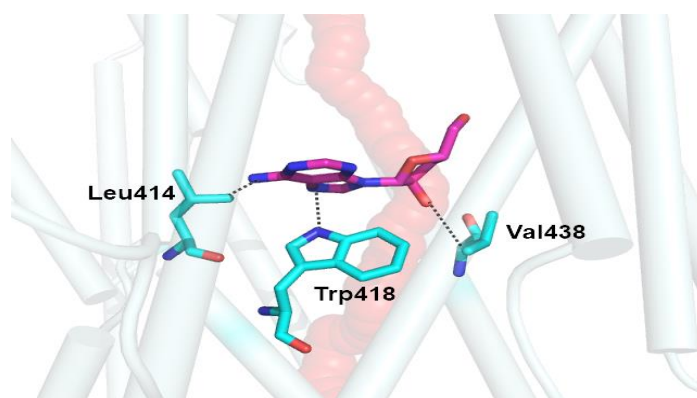

(B)

Figure S2

Supplement: s1 [file s1]
